# Supplementary material for: One-step formation of three-dimensional macroporous bacterial sponges as a novel approach for the preparation of bioreactors for bioremediation and green treatment of water
Source: PubMed Central journal article supplement (PMC9085471; doi:10.1039/c8ra04219e), 2018-09-03
Supplement: RA-008-C8RA04219E-s001.pdf [file RA-008-C8RA04219E-s001.pdf]

## Supplementary information

One-step formation of three-dimensional macroporous bacteria biofilm sponge as a novel approach for preparation of bioreactor for bioremediation and green treatment of water.

Areej K.Al-Jwaid<sup>1&2\*</sup>, Dmitriy Berillo<sup>3\*</sup>, Irina Savina<sup>3\*\*</sup>, Andrew B.Cundy<sup>4</sup>, Jonathan L.Caplin<sup>1</sup>

<sup>1</sup> School of Environment and Technology, University of Brighton, Brighton, UK.

<sup>2</sup> Engineering Technical College/ Basrah, Southern Technical University, Basrah, Iraq.

<sup>3</sup> School of Pharmacy and Biomolecular Sciences, University of Brighton, Brighton, UK.

<sup>4</sup> Ocean and Earth Science, University of Southampton, Southampton, UK.

\*Both authors contributed equally to this manuscript.

\*\*Corresponding author e-mail: i.n.savina@brighton.ac.uk

Graphical abstract

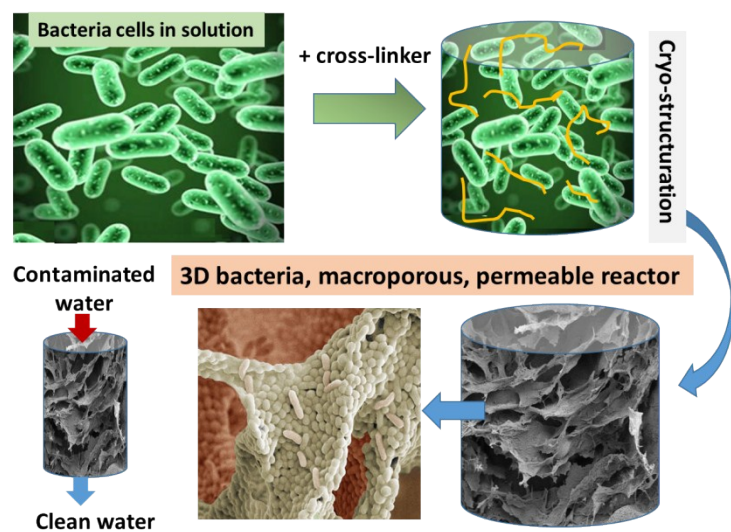

Polymer analysis.

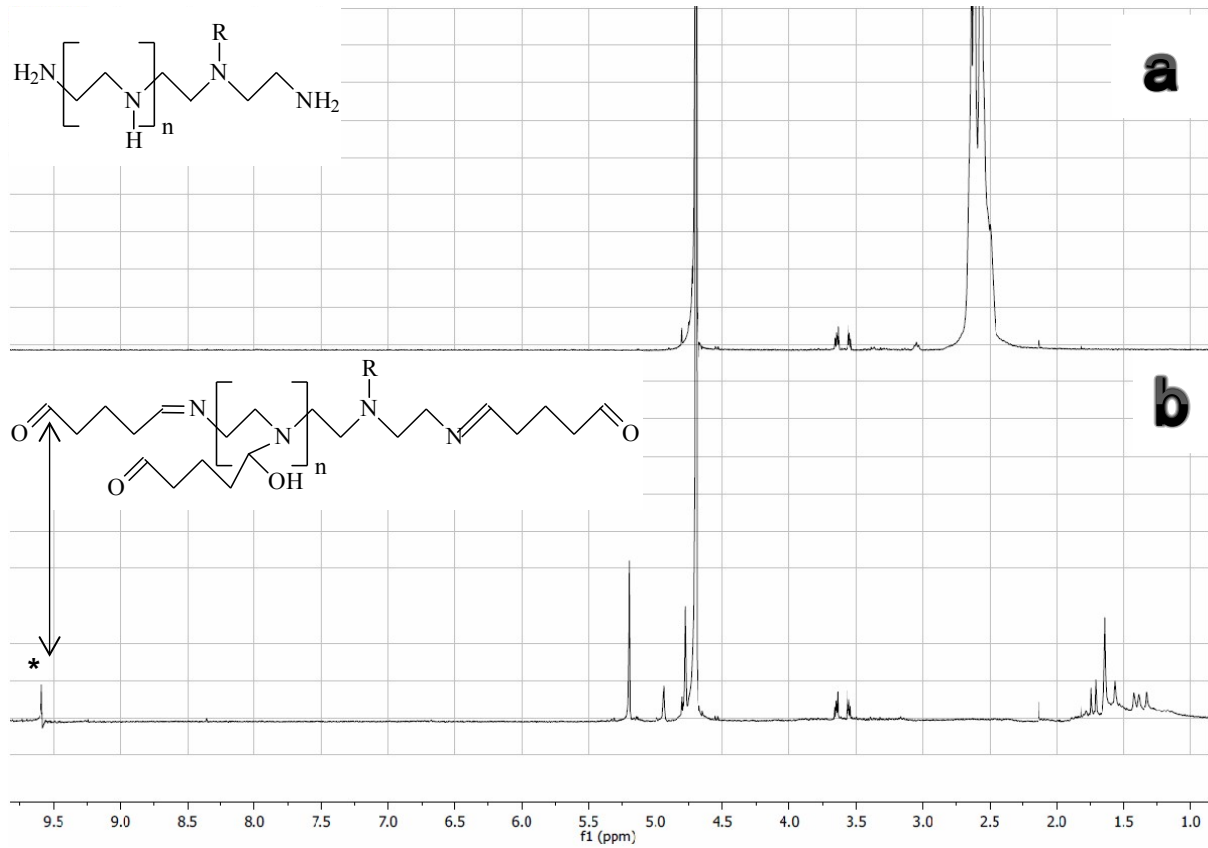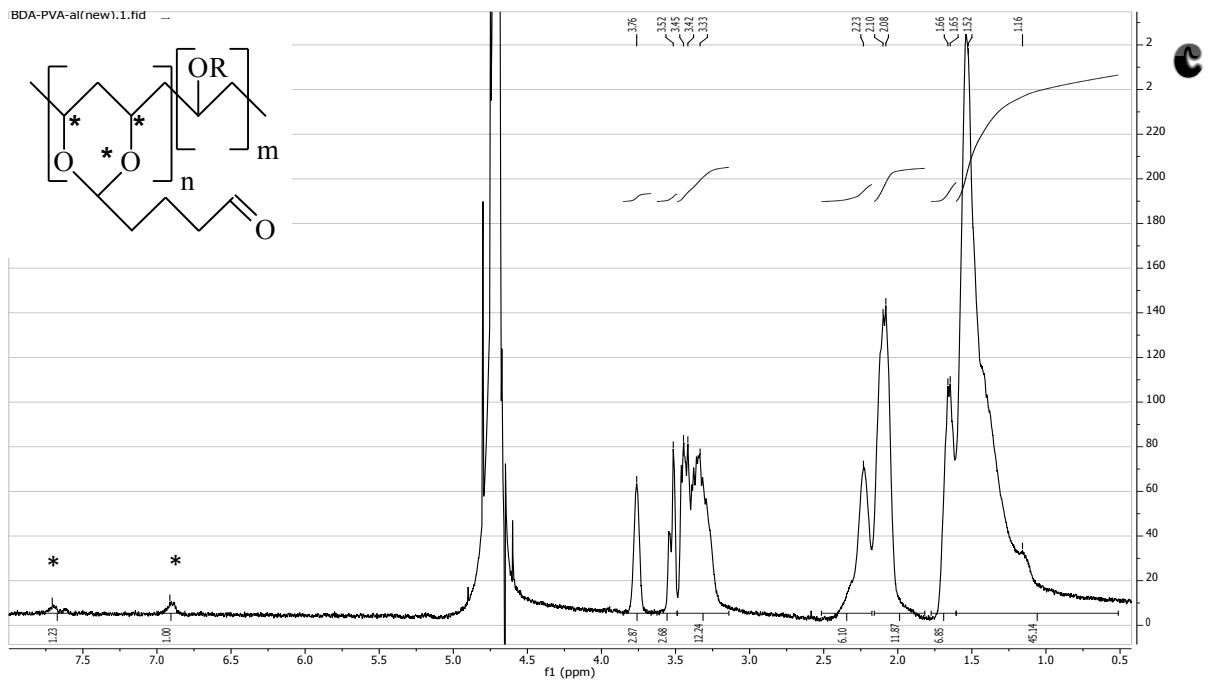

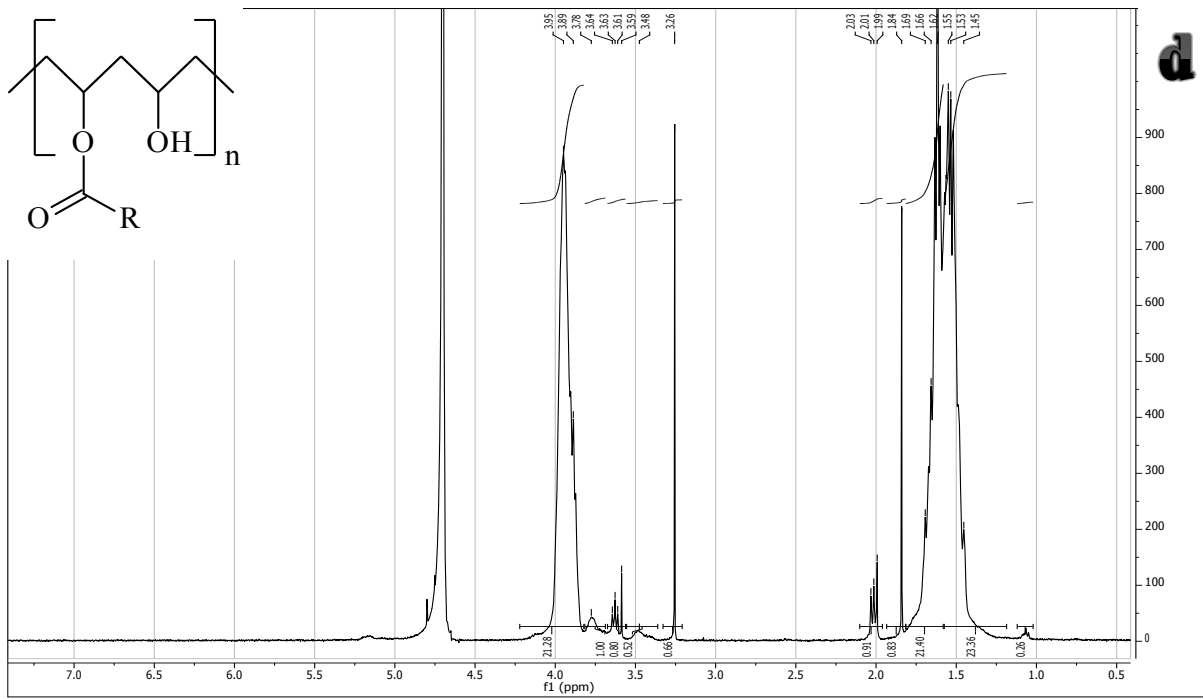

d

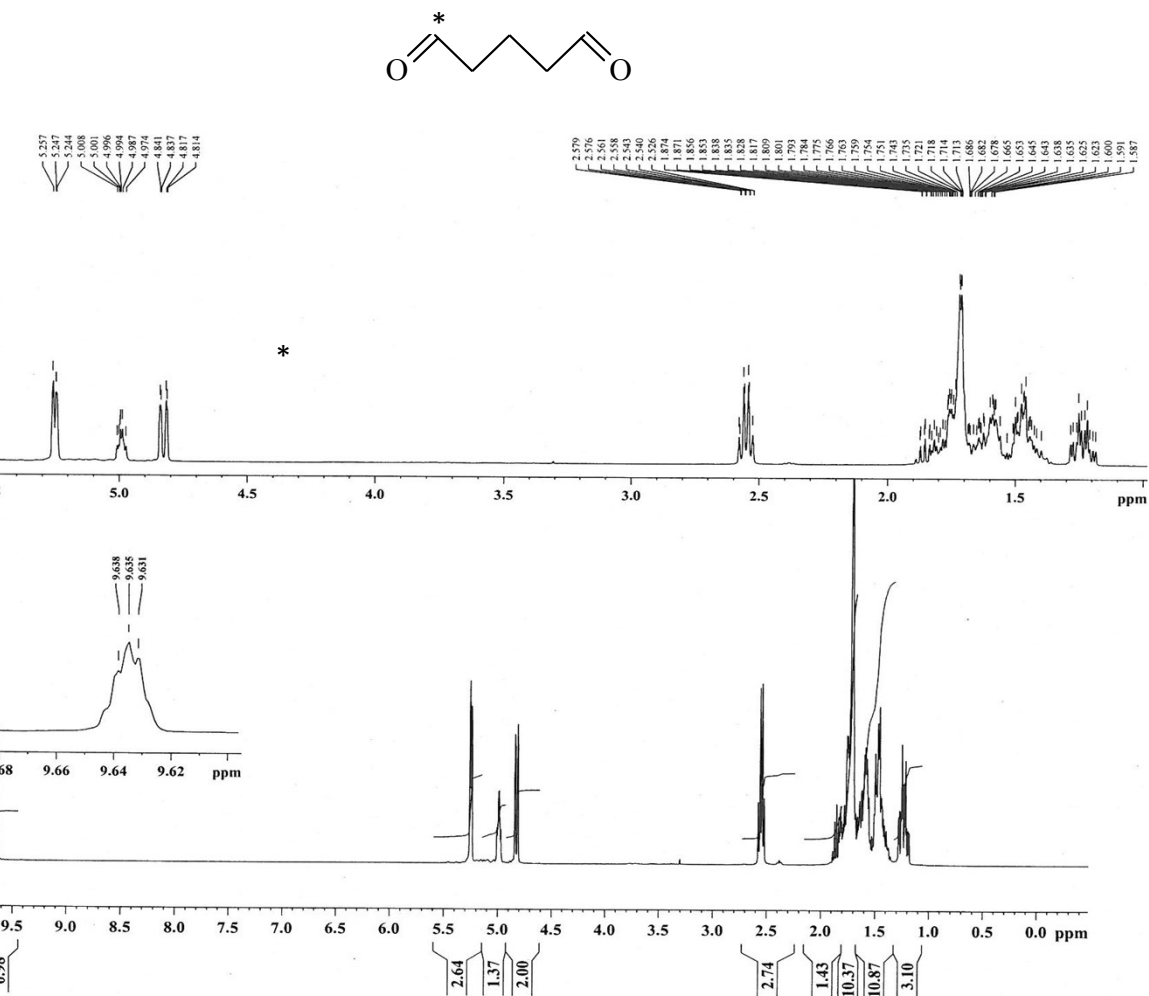

Fig. S1. H-NMR-spectra of a) PEI, b) PEI-al, c) PVA-al, d) PVA, e) glutaraldehyde in D<sub>2</sub>O.

B

-C(=O)H

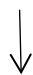

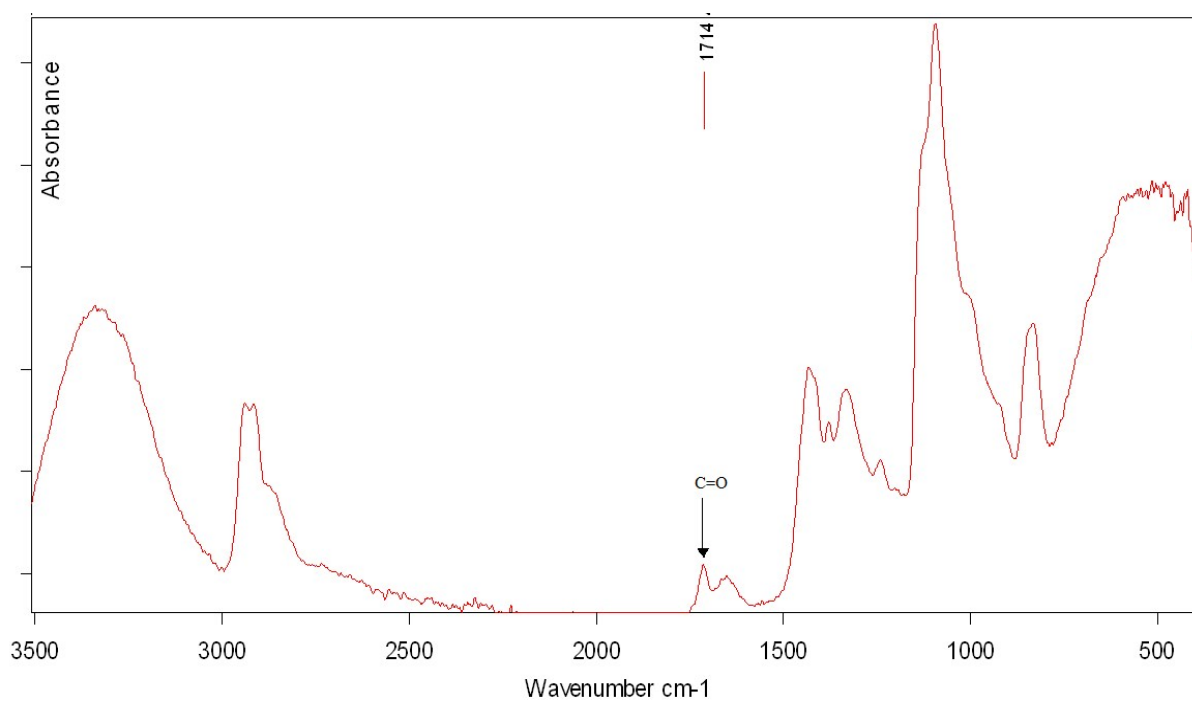

**Figure S2.** FTIR-spectrum of PVA-al

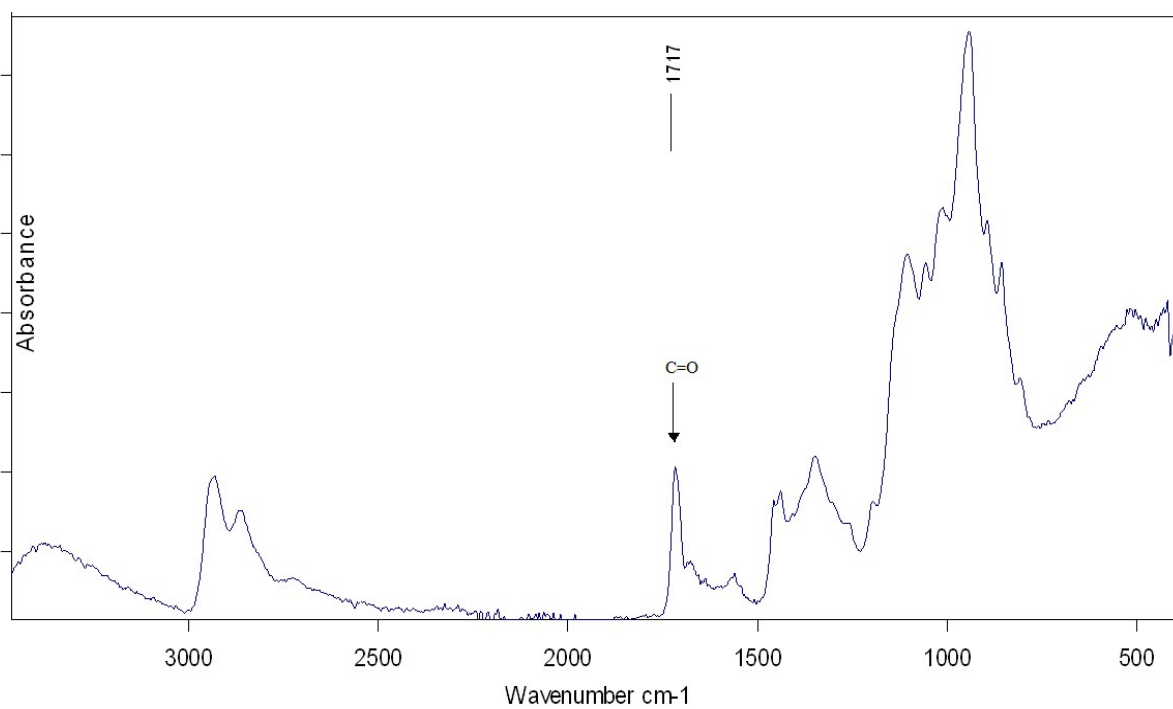

**Figure S3.** FTIR-spectrum of PEI-al.

**HPLC settings and analysis.**

Mobile phase 1% v/v acetic acid in water (C) and 1% v/v acetic acid in methanol (D). The method details: column temperature 45C, sample temperature 25C, C) Gradient Start at 75.0, End at 44.0%, D) Gradient Start at 25.0, End at 56.0% for 9.5minutes, and at composition 44%-56% C-D for 5min. C) Gradient Start at 44.0, End at 0.0% with duration of 1.0 min and D) Gradient Start at 56.0%, End at 100.0%, for 1.0min. 5 minutes at 100% of CH<sub>3</sub>OH&1% HAc. C) Gradient Start at 0.0, End at 75.0% for 1.0min; D) Gradient Start at 100.0, End at 25.0% with duration of 1.0min.

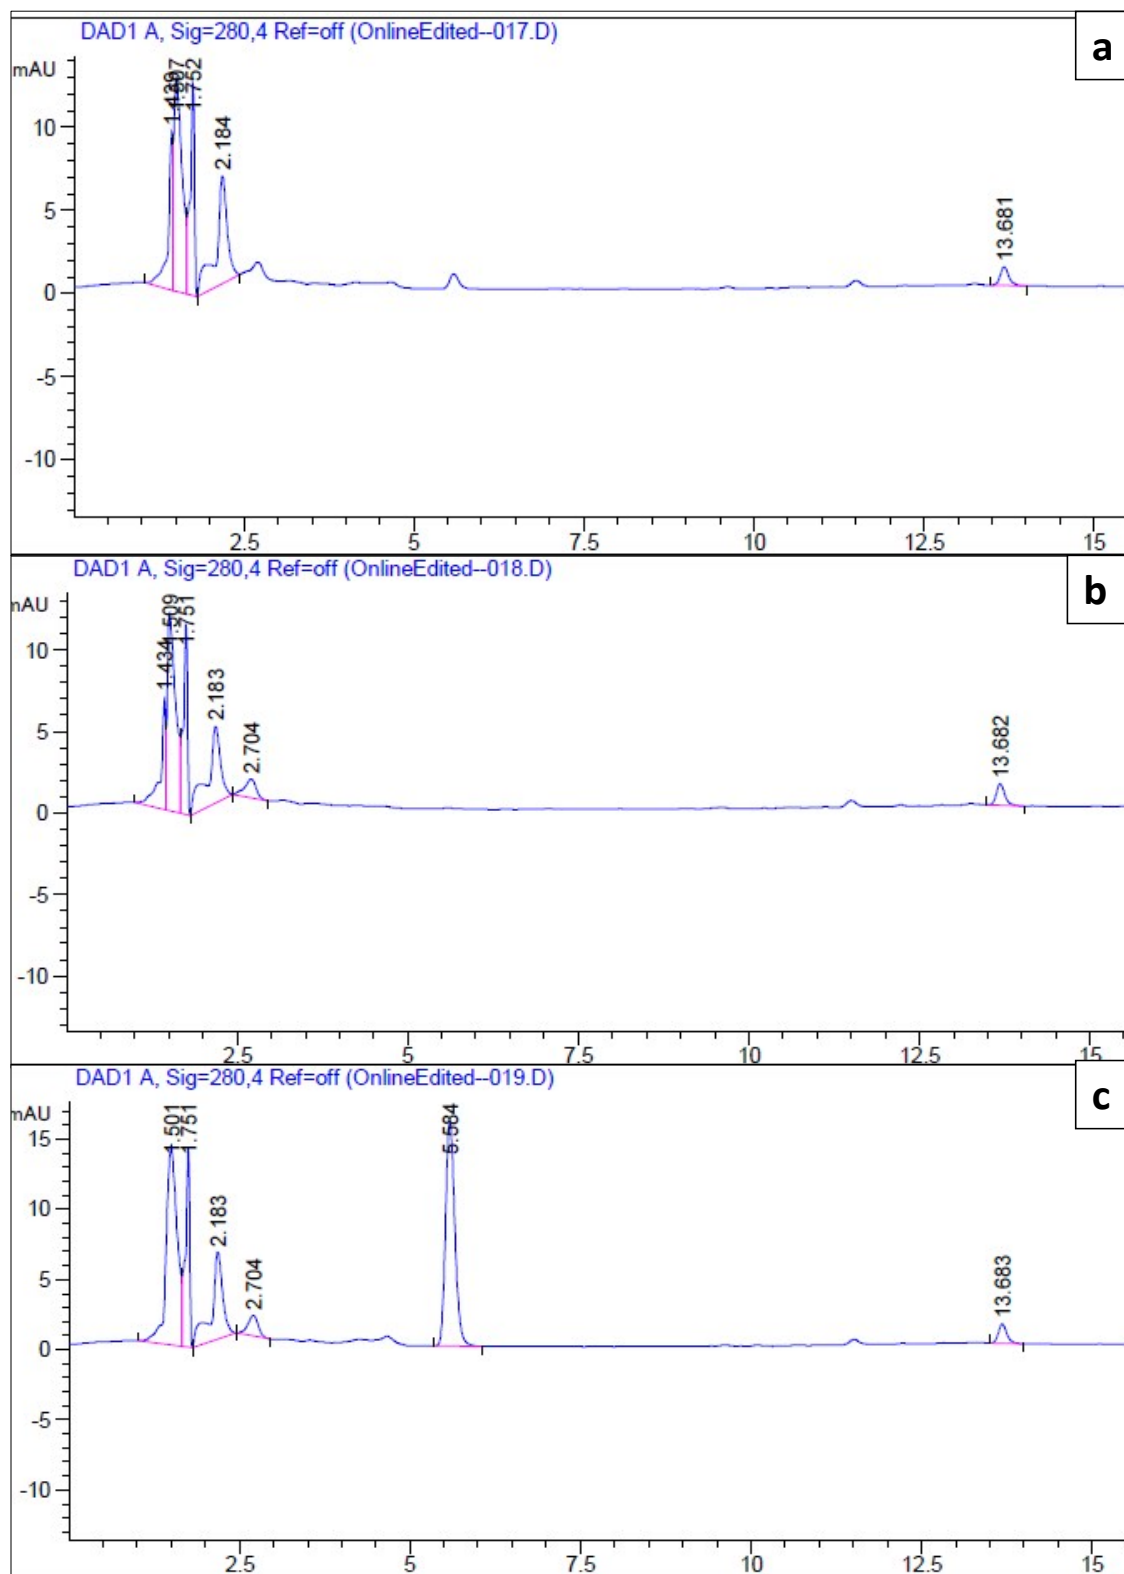

**Figure S4.** HPLC chromatogram of the solution after phenol degradation by the cryogel composed of: a) mixed bacteria strains *Rhodococcus koreensis* and *Pseudomonas mendocina*; b) *Rhodococcus koreensis* c) *Pseudomonas mendocina*.

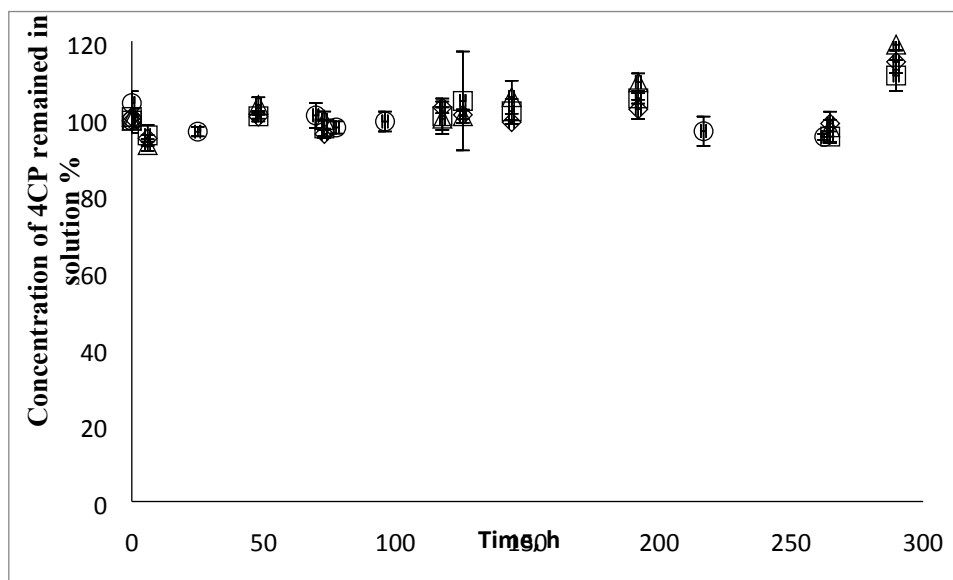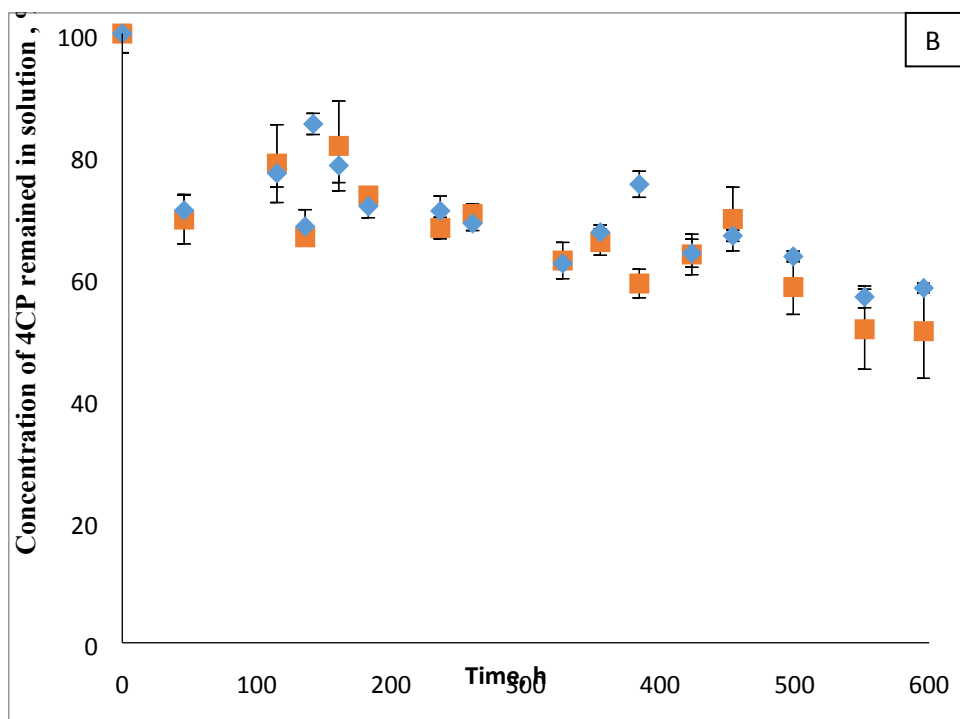

**Figure S5.** Degradation kinetic of 4CP (V 40ml 50mg/L) in 25mM carbonate buffer, dynamic mode (shaking at 150 rpm): A) suspension of free *Rhodococcus koreensis* commercial(triangle); *Rhodococcus koreensis* 4CP adapted(square); *Pseudomonas mendocina* commercial(circle) *Pseudomonas mendocina* 4CP adapted number of cell  $0.7 \times 10^8$  per sample (n=3). B) Cryogels *Pseudomonas* PVA-al 1.7% (square), *Pseudomonas* PVA-al -PEI-al 0.6-0.5 % (rhomb).



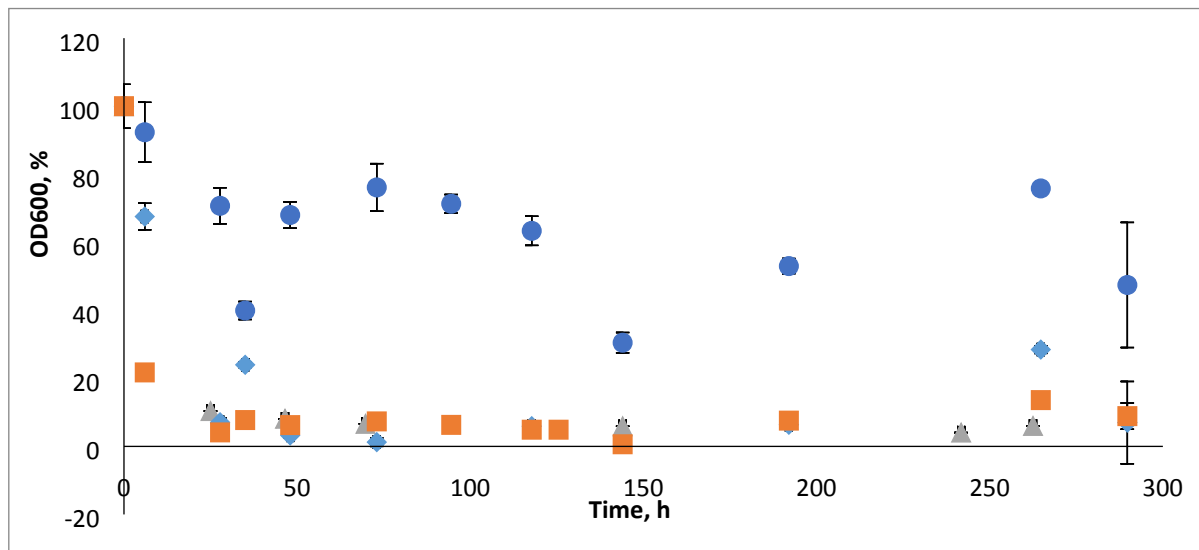

**Figure S6.** Kinetic of change of viable bacteria in the 50 mg/L of 4CP solution in 25 mM carbonate buffer in a dynamic mode (shaking at 150 rpm): *Pseudomonas mendocina* adapted to phenol (triangle); *Pseudomonas mendocina* commercial (circle); *Rhodococcus koreensis* (square) and *Rhodococcus koreensis* adapted to phenol (rhomb).
